# Supplementary material for: Activation of PI3K/AKT/mTOR signaling axis by UBE2S inhibits autophagy leading to cisplatin resistance in ovarian cancer
Source: Springer Nature journal article supplement (doi:10.1186/s13048-023-01314-y), 2023-12-19

## I. UBE2S data collection

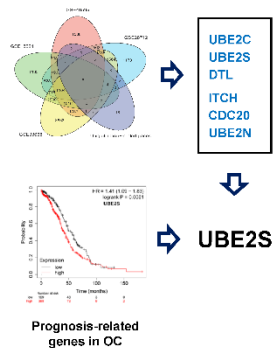

## II. Landscape of UBE2S in ovarian cancer

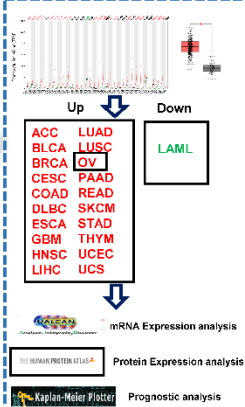

## III. Landscape of UBE2S in Platinum-resistant ovarian cancer

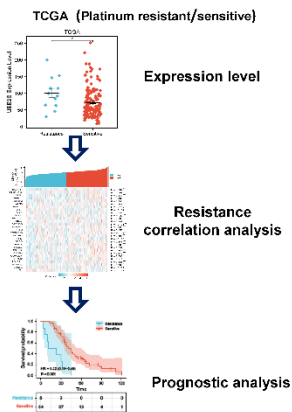

## IV. Molecular and clinical relevance

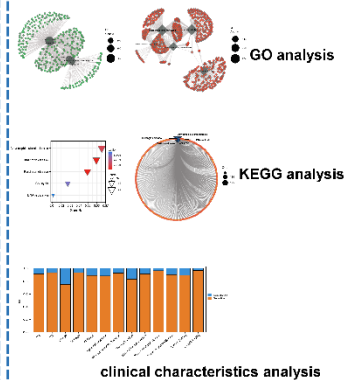

## Experiment verification

## V. UBE2S knock-down experiment (SKOV3-DDP; A2780-DDP)

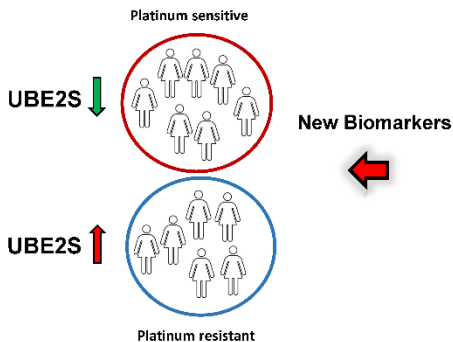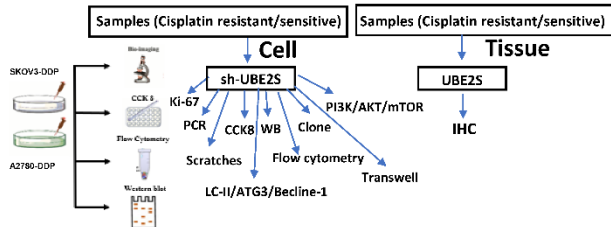

Supplement: MOESM3 [file 13048_2023_1314_MOESM3_ESM.pdf]
